# Supplementary material for: Aptamer-Based Sandwich Assay Formats for Detection and Discrimination of Human High- and Low-Molecular-Weight uPA for Cancer Prognosis and Diagnosis
Source: MDPI journal article supplement (doi:10.3390/cancers14215222), 2022-10-25
Supplement: s1 [file s1]

# Supplementary Materials: Aptamer-based Sandwich Assay Formats for Detection and Discrimination of High- and Low-Molecular-Weight uPA for Cancer Prognosis and Diagnosis

Nico Dreyman<sup>1,2</sup>, Wiebke Sabrowski<sup>1,3</sup>, Jennifer Danso<sup>1,4</sup> and Marcus M. Menger<sup>1,\*</sup>

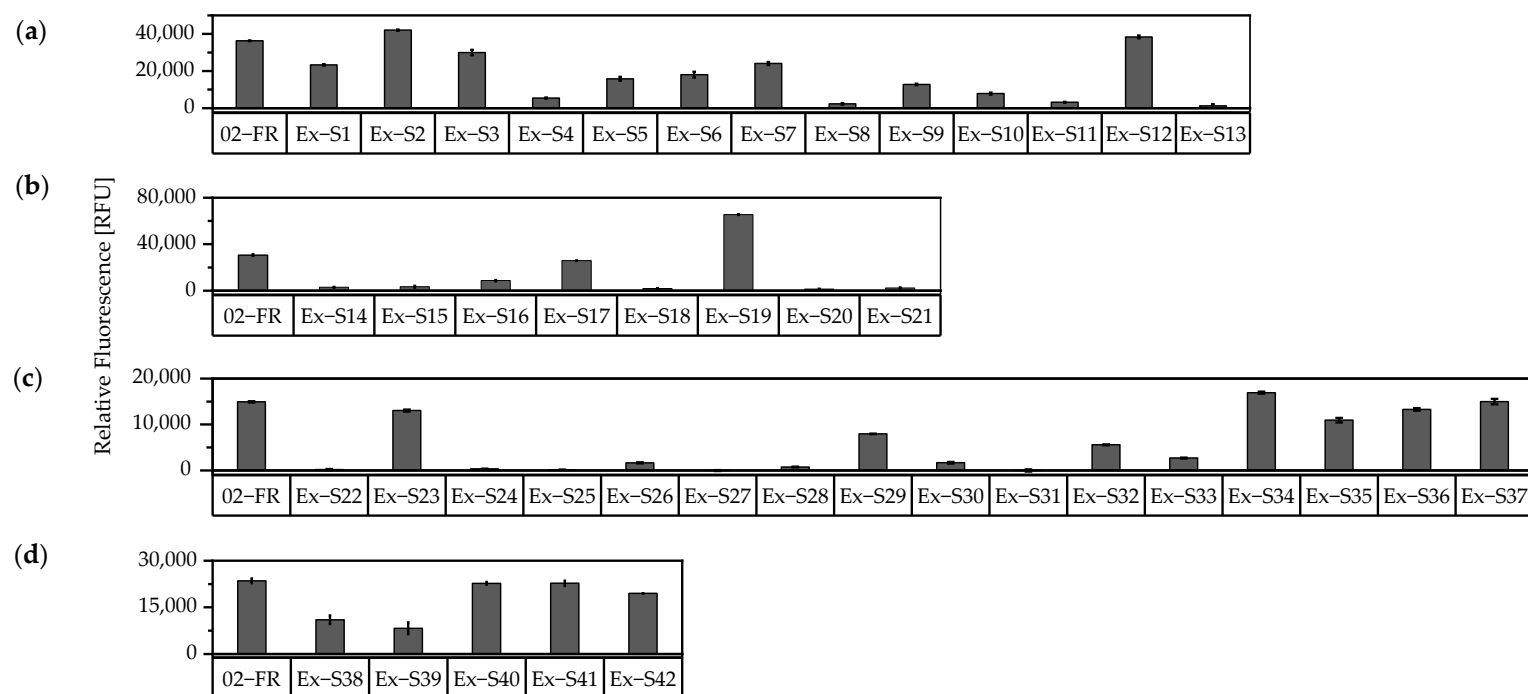

**Figure S1.** Binding of the exchange sequences (Ex-S1 – Ex-S42) to HMW-uPA by FLAA. Binding experiments were performed on different micro titer plates and are therefore shown as individual diagrams with the respective positive control uPAapt-02-FR (02-FR). (a) Ex-S1 – Ex-S13 (b) Ex-S14 – Ex-S21 (c) Ex-S22 – Ex-S37 (d) Ex-S38 – Ex-S42. The relative fluorescence unit [RFU] for each sample is given as the mean value of technical replicates and was measured using the multimode microplate reader Mithras<sup>2</sup> LB943. Negative control values were subtracted. Error bars represent the range of measured values of signals from the two target-coated wells plus the range of the measured values of the two negative control wells. Number of records  $n=2$ .

**Table S1.** Exchange sequences of uPAapt-02-FR. Each nucleotide of the sequence of uPAapt-02-FR was replaced individually (for G/C a T and for A/T a C). All 42 new sequence aptamers (Ex-S1 – Ex-S42) were tested for binding to HMW-uPA by FLAA. The reduction in fluorescence signal compared to the control uPAapt-02-FR is given as a percentage for each sequence. Exchanged nucleotides in each sequence are shown in red.

| Name   | Sequence                                    | Signal reduction compared to control (uPAapt-02-FR) |
|--------|---------------------------------------------|-----------------------------------------------------|
| Ex-S1  | TAAGCGGGGGTGAGAGATCTGTCAGTACGAGCTGGGTTTGCG  | 36%                                                 |
| Ex-S2  | CCAGCGGGGGTGAGAGATCTGTCAGTACGAGCTGGGTTTGCG  | n.r.*                                               |
| Ex-S3  | CAACGCGGGGGTGAGAGATCTGTCAGTACGAGCTGGGTTTGCG | 18%                                                 |
| Ex-S4  | CAATCGGGGGTGAGAGATCTGTCAGTACGAGCTGGGTTTGCG  | 85%                                                 |
| Ex-S5  | CAAGTCGGGGGTGAGAGATCTGTCAGTACGAGCTGGGTTTGCG | 56%                                                 |
| Ex-S6  | CAAGCTGGGGGTGAGAGATCTGTCAGTACGAGCTGGGTTTGCG | 50%                                                 |
| Ex-S7  | CAAGCGTGGGGTGAGAGATCTGTCAGTACGAGCTGGGTTTGCG | 34%                                                 |
| Ex-S8  | CAAGCGGTGGGTGAGAGATCTGTCAGTACGAGCTGGGTTTGCG | 94%                                                 |
| Ex-S9  | CAAGCGGGTGTGAGAGATCTGTCAGTACGAGCTGGGTTTGCG  | 65%                                                 |
| Ex-S10 | CAAGCGGGGTGAGAGATCTGTCAGTACGAGCTGGGTTTGCG   | 78%                                                 |
| Ex-S11 | CAAGCGGGGGCGAGAGATCTGTCAGTACGAGCTGGGTTTGCG  | 91%                                                 |
| Ex-S12 | CAAGCGGGGGTTAGAGATCTGTCAGTACGAGCTGGGTTTGCG  | n.r.*                                               |
| Ex-S13 | CAAGCGGGGGTGCGAGATCTGTCAGTACGAGCTGGGTTTGCG  | 97%                                                 |
| Ex-S14 | CAAGCGGGGGTGATAGATCTGTCAGTACGAGCTGGGTTTGCG  | 91%                                                 |
| Ex-S15 | CAAGCGGGGGTGAGCGATCTGTCAGTACGAGCTGGGTTTGCG  | 89%                                                 |
| Ex-S16 | CAAGCGGGGGTGAGATATCTGTCAGTACGAGCTGGGTTTGCG  | 72%                                                 |
| Ex-S17 | CAAGCGGGGGTGAGAGCTCTGTCAGTACGAGCTGGGTTTGCG  | 16%                                                 |
| Ex-S18 | CAAGCGGGGGTGAGAGACCTGTCAGTACGAGCTGGGTTTGCG  | 94%                                                 |
| Ex-S19 | CAAGCGGGGGTGAGAGATTGTCAGTACGAGCTGGGTTTGCG   | 0%*                                                 |
| Ex-S20 | CAAGCGGGGGTGAGAGATCCGTCAGTACGAGCTGGGTTTGCG  | 95%                                                 |
| Ex-S21 | CAAGCGGGGGTGAGAGATCTTTCAGTACGAGCTGGGTTTGCG  | 92%                                                 |
| Ex-S22 | CAAGCGGGGGTGAGAGATCTGCCAGTACGAGCTGGGTTTGCG  | 99%                                                 |
| Ex-S23 | CAAGCGGGGGTGAGAGATCTGTAGTACGAGCTGGGTTTGCG   | 13%                                                 |
| Ex-S24 | CAAGCGGGGGTGAGAGATCTGTCGTACGAGCTGGGTTTGCG   | 98%                                                 |
| Ex-S25 | CAAGCGGGGGTGAGAGATCTGTCA TTACGAGCTGGGTTTGCG | 99%                                                 |
| Ex-S26 | CAAGCGGGGGTGAGAGATCTGTCAGCACGAGCTGGGTTTGCG  | 89%                                                 |
| Ex-S27 | CAAGCGGGGGTGAGAGATCTGTCAGTCCGAGCTGGGTTTGCG  | 100%                                                |
| Ex-S28 | CAAGCGGGGGTGAGAGATCTGTCAGTATGAGCTGGGTTTGCG  | 95%                                                 |
| Ex-S29 | CAAGCGGGGGTGAGAGATCTGTCAGTACTAGCTGGGTTTGCG  | 47%                                                 |
| Ex-S30 | CAAGCGGGGGTGAGAGATCTGTCAGTACCGCTGGGTTTGCG   | 89%                                                 |
| Ex-S31 | CAAGCGGGGGTGAGAGATCTGTCAGTACGATCTGGGTTTGCG  | 100%                                                |
| Ex-S32 | CAAGCGGGGGTGAGAGATCTGTCAGTACGAGTTGGGTTTGCG  | 63%                                                 |
| Ex-S33 | CAAGCGGGGGTGAGAGATCTGTCAGTACGAGCCGGGTTTGCG  | 82%                                                 |
| Ex-S34 | CAAGCGGGGGTGAGAGATCTGTCAGTACGAGCTTGGTTTGCG  | 0%*                                                 |
| Ex-S35 | CAAGCGGGGGTGAGAGATCTGTCAGTACGAGCTGTGTTTGCG  | 27%                                                 |
| Ex-S36 | CAAGCGGGGGTGAGAGATCTGTCAGTACGAGCTGGTTTTGCG  | 11%                                                 |
| Ex-S37 | CAAGCGGGGGTGAGAGATCTGTCAGTACGAGCTGGGCTTGCG  | n.r.*                                               |
| Ex-S38 | CAAGCGGGGGTGAGAGATCTGTCAGTACGAGCTGGGTCTGCG  | 53%                                                 |
| Ex-S39 | CAAGCGGGGGTGAGAGATCTGTCAGTACGAGCTGGGTTCCG   | 65%                                                 |
| Ex-S40 | CAAGCGGGGGTGAGAGATCTGTCAGTACGAGCTGGGTTTTCG  | 3%                                                  |
| Ex-S41 | CAAGCGGGGGTGAGAGATCTGTCAGTACGAGCTGGGTTTGTG  | 3%                                                  |
| Ex-S42 | CAAGCGGGGGTGAGAGATCTGTCAGTACGAGCTGGGTTTGCT  | 17%                                                 |

Note: n.r.\*, no reduction (equal or higher signal compared to control uPAapt-02-FR).
